# Supplementary material for: Bisphenol A—A Dangerous Pollutant Distorting the Biological Properties of Soil
Source: MDPI journal article supplement (doi:10.3390/ijms222312753), 2021-11-25
Supplement: s1 [file s1]

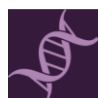

Supplementary

# Bisphenol A – A Dangerous Pollutant Distorting the Biological Properties of Soil

Magdalena Zaborowska<sup>1</sup>, Jadwiga Wyszowska<sup>1\*</sup>, Agata Borowik<sup>1</sup>, Jan Kucharski<sup>1</sup>

<sup>1</sup> Department of Soil Science and Microbiology, University of Warmia and Mazury in Olsztyn, Plac Łódzki 3, 10 - 727 Olsztyn, Poland; [m.zaborowska@uwm.edu.pl](mailto:m.zaborowska@uwm.edu.pl); [agata.borowik@uwm.edu.pl](mailto:agata.borowik@uwm.edu.pl); [jan.kucharski@uwm.edu.pl](mailto:jan.kucharski@uwm.edu.pl)

\*Correspondence: [jadwiga.wyszowska@uwm.edu.pl](mailto:jadwiga.wyszowska@uwm.edu.pl); <https://orcid.org/0000-0002-2156-3780>

Tel.: +48 89 523 49 38 (J.W.)

**Table S1.** Enzymatic activity in soil contaminated with BPA (kg<sup>-1</sup> d.m. of soil h<sup>-1</sup>)

| Dose of BPA<br>mg kg <sup>-1</sup><br>d.m. of soil | Deh<br>(μMol<br>TFF) | Cat<br>(Mol O <sub>2</sub> ) | Pac                 | Pal<br>(mMol 4-nitrophenol PN) | Aryl                | Glu                 | Ure<br>(mMol<br>N-NH <sub>4</sub> ) |
|----------------------------------------------------|----------------------|------------------------------|---------------------|--------------------------------|---------------------|---------------------|-------------------------------------|
| soil sown with spring rape (Bn)                    |                      |                              |                     |                                |                     |                     |                                     |
| 0                                                  | 3.772 <sup>d</sup>   | 0.171 <sup>bcd</sup>         | 1.925 <sup>d</sup>  | 0.510 <sup>c</sup>             | 0.026 <sup>bc</sup> | 0.742 <sup>bc</sup> | 0.261 <sup>b</sup>                  |
| 10                                                 | 10.611 <sup>b</sup>  | 0.181 <sup>bcd</sup>         | 2.188 <sup>bc</sup> | 0.582 <sup>bc</sup>            | 0.027 <sup>bc</sup> | 0.784 <sup>ab</sup> | 0.270 <sup>ab</sup>                 |
| 100                                                | 4.747 <sup>d</sup>   | 0.161 <sup>de</sup>          | 2.033 <sup>cd</sup> | 0.590 <sup>bc</sup>            | 0.028 <sup>bc</sup> | 0.791 <sup>ab</sup> | 0.320 <sup>a</sup>                  |
| 1000                                               | 1.424 <sup>e</sup>   | 0.156 <sup>e</sup>           | 1.577 <sup>e</sup>  | 0.615 <sup>b</sup>             | 0.046 <sup>a</sup>  | 0.629 <sup>c</sup>  | 0.148 <sup>c</sup>                  |
| soil sown with maize (Zm)                          |                      |                              |                     |                                |                     |                     |                                     |
| 0                                                  | 9.599 <sup>bc</sup>  | 0.196 <sup>b</sup>           | 2.295 <sup>ab</sup> | 0.557 <sup>bc</sup>            | 0.023 <sup>bc</sup> | 0.852 <sup>ab</sup> | 0.278 <sup>ab</sup>                 |
| 10                                                 | 13.995 <sup>a</sup>  | 0.185 <sup>bc</sup>          | 2.365 <sup>a</sup>  | 0.606 <sup>b</sup>             | 0.024 <sup>bc</sup> | 0.823 <sup>ab</sup> | 0.315 <sup>ab</sup>                 |
| 100                                                | 12.970 <sup>a</sup>  | 0.186 <sup>bc</sup>          | 2.138 <sup>bc</sup> | 0.633 <sup>b</sup>             | 0.016 <sup>c</sup>  | 0.937 <sup>a</sup>  | 0.281 <sup>ab</sup>                 |
| 1000                                               | 8.527 <sup>c</sup>   | 0.259 <sup>a</sup>           | 1.733 <sup>e</sup>  | 0.900 <sup>a</sup>             | 0.038 <sup>ab</sup> | 0.732 <sup>bc</sup> | 0.089 <sup>d</sup>                  |

Deh – dehydrogenases; Cat – catalase; Ure – urease; Pal – alkaline phosphatase; Pac – acid phosphatase; Glu –  $\beta$ -glucosidase; Aryl – arylsulfatase. Homogeneous groups specified in columns denoted with letters (a–e), for each enzyme, depending on the increasing doses of BPA and sowing the soil with plants.

**Table S2.** The number of microorganisms in soil contaminated with BPA (  $10^n$  cfu · kg<sup>-1</sup> d.m. of soil)

| Dose of BPA<br>mg kg <sup>-1</sup><br>d.m. of soil | Org                  | Act                  | Fun                  | Ps                  | Art                  |
|----------------------------------------------------|----------------------|----------------------|----------------------|---------------------|----------------------|
| soil sown with spring rape (Bn)                    |                      |                      |                      |                     |                      |
| 0                                                  | 16.250 <sup>de</sup> | 6.983 <sup>e</sup>   | 13.695 <sup>d</sup>  | 1.413 <sup>c</sup>  | 1.202 <sup>f</sup>   |
| 10                                                 | 14.429 <sup>e</sup>  | 11.440 <sup>cd</sup> | 42.065 <sup>b</sup>  | 3.432 <sup>c</sup>  | 1.606 <sup>ef</sup>  |
| 100                                                | 22.608 <sup>d</sup>  | 18.505 <sup>b</sup>  | 57.798 <sup>a</sup>  | 10.251 <sup>b</sup> | 6.738 <sup>bc</sup>  |
| 1000                                               | 42.472 <sup>ab</sup> | 12.391 <sup>cd</sup> | 9.375 <sup>d</sup>   | 10.724 <sup>b</sup> | 12.609 <sup>a</sup>  |
| soil sown with maize (Zm)                          |                      |                      |                      |                     |                      |
| 0                                                  | 33.722 <sup>c</sup>  | 9.972 <sup>de</sup>  | 11.576 <sup>d</sup>  | 3.643 <sup>c</sup>  | 5.246 <sup>bcd</sup> |
| 10                                                 | 19.755 <sup>de</sup> | 13.478 <sup>cd</sup> | 31.684 <sup>c</sup>  | 2.828 <sup>c</sup>  | 4.242 <sup>def</sup> |
| 100                                                | 36.358 <sup>bc</sup> | 14.918 <sup>bc</sup> | 36.087 <sup>bc</sup> | 10.245 <sup>b</sup> | 7.471 <sup>bc</sup>  |
| 1000                                               | 44.782 <sup>a</sup>  | 28.858 <sup>a</sup>  | 17.907 <sup>d</sup>  | 25.968 <sup>a</sup> | 8.796 <sup>ab</sup>  |

n-exponent: 8 for Org, Act, Ps, Art; 6 for Fun; Homogeneous groups specified in columns denoted with letters (a–f) were calculated separately for each group of microorganisms, depending on the increasing doses of BPA and sowing the soil with plants.

**Table S3.** Shannon–Wiener and Simpson indices calculated from the abundance of operational taxonomic unit OTU

| Bacterial<br>taxon        | Bn   | BnBPA | Zm   | ZmBPA |
|---------------------------|------|-------|------|-------|
| Shannon-Wiener index (H') |      |       |      |       |
| phylum                    | 1.64 | 1.51  | 1.65 | 1.04  |
| class                     | 2.53 | 2.42  | 2.62 | 1.76  |
| order                     | 2.83 | 2.89  | 3.10 | 2.26  |
| family                    | 3.23 | 3.03  | 3.31 | 2.48  |
| genus                     | 2.94 | 3.19  | 3.14 | 2.69  |
| Simpson index (D)         |      |       |      |       |
| phylum                    | 0.71 | 0.67  | 0.70 | 0.48  |
| class                     | 0.84 | 0.85  | 0.86 | 0.70  |
| order                     | 0.85 | 0.91  | 0.92 | 0.80  |
| family                    | 0.92 | 0.92  | 0.93 | 0.82  |
| genus                     | 0.85 | 0.93  | 0.90 | 0.86  |

| Mold fungus<br>taxon      | Bn   | BnBPA | Zm   | ZmBPA |
|---------------------------|------|-------|------|-------|
| Shannon-Wiener index (H') |      |       |      |       |
| phylum                    | 0.79 | 1.12  | 0.68 | 0.51  |
| class                     | 1.15 | 1.67  | 1.18 | 0.88  |
| order                     | 1.50 | 2.16  | 1.80 | 1.02  |
| family                    | 1.62 | 2.25  | 2.06 | 0.92  |
| genus                     | 1.89 | 2.32  | 2.25 | 0.90  |
| Simpson index (D)         |      |       |      |       |
| phylum                    | 0.41 | 0.59  | 0.31 | 0.21  |
| class                     | 0.50 | 0.74  | 0.49 | 0.35  |
| order                     | 0.62 | 0.81  | 0.70 | 0.36  |
| family                    | 0.62 | 0.82  | 0.72 | 0.31  |
| genus                     | 0.69 | 0.82  | 0.71 | 0.29  |

**Table S4.** Average SPAD values on day 59 of spring rape (Bn) and maize (Zm) growth in soil contaminated with BPA

| Dose of BPA kg <sup>-1</sup><br>d.m. of soil | Spring rape (Bn)<br>BBCH 59 | Maize (Zm)<br>BBCH 59 |
|----------------------------------------------|-----------------------------|-----------------------|
| 0                                            | 36.71 <sup>a</sup>          | 34.79 <sup>a</sup>    |
| 10                                           | 35.23 <sup>a</sup>          | 31.94 <sup>a</sup>    |
| 100                                          | 38.80 <sup>a</sup>          | 33.26 <sup>a</sup>    |
| 1000                                         | 35.27 <sup>a</sup>          | 33.12 <sup>a</sup>    |

Homogeneous groups specified in columns were calculated separately for each plant
